# Supplementary material
Source: PubMed Central journal article supplement (PMC4019320)
Supplement: supp_113.211557_jpet211557_suppl_figure_1.pdf [file supp_113.211557_jpet211557_suppl_figure_1.pdf]

# Effects of Duloxetine and WAY100635 on Pudendal Inhibition of Bladder Overactivity in Cats

Jeremy Reese, Zhiying Xiao, Zeyad Schwen, Yosuke Matsuta, Bing Shen,  
Jicheng Wang, James R. Roppolo, William C. de Groat, Changfeng Tai

Department of Urology, University of Pittsburgh, Pittsburgh, PA, USA (J.R., Z.X., Z.S., Y.M.,  
B.S., J.W., C.T.)

Department of Urology, The Second Hospital, Shandong University, Jinan, P.R. China (Z.X.)

Department of Pharmacology and Chemical Biology, University of Pittsburgh, Pittsburgh, PA,  
USA (J.R.R., W.C.D., C.T.)

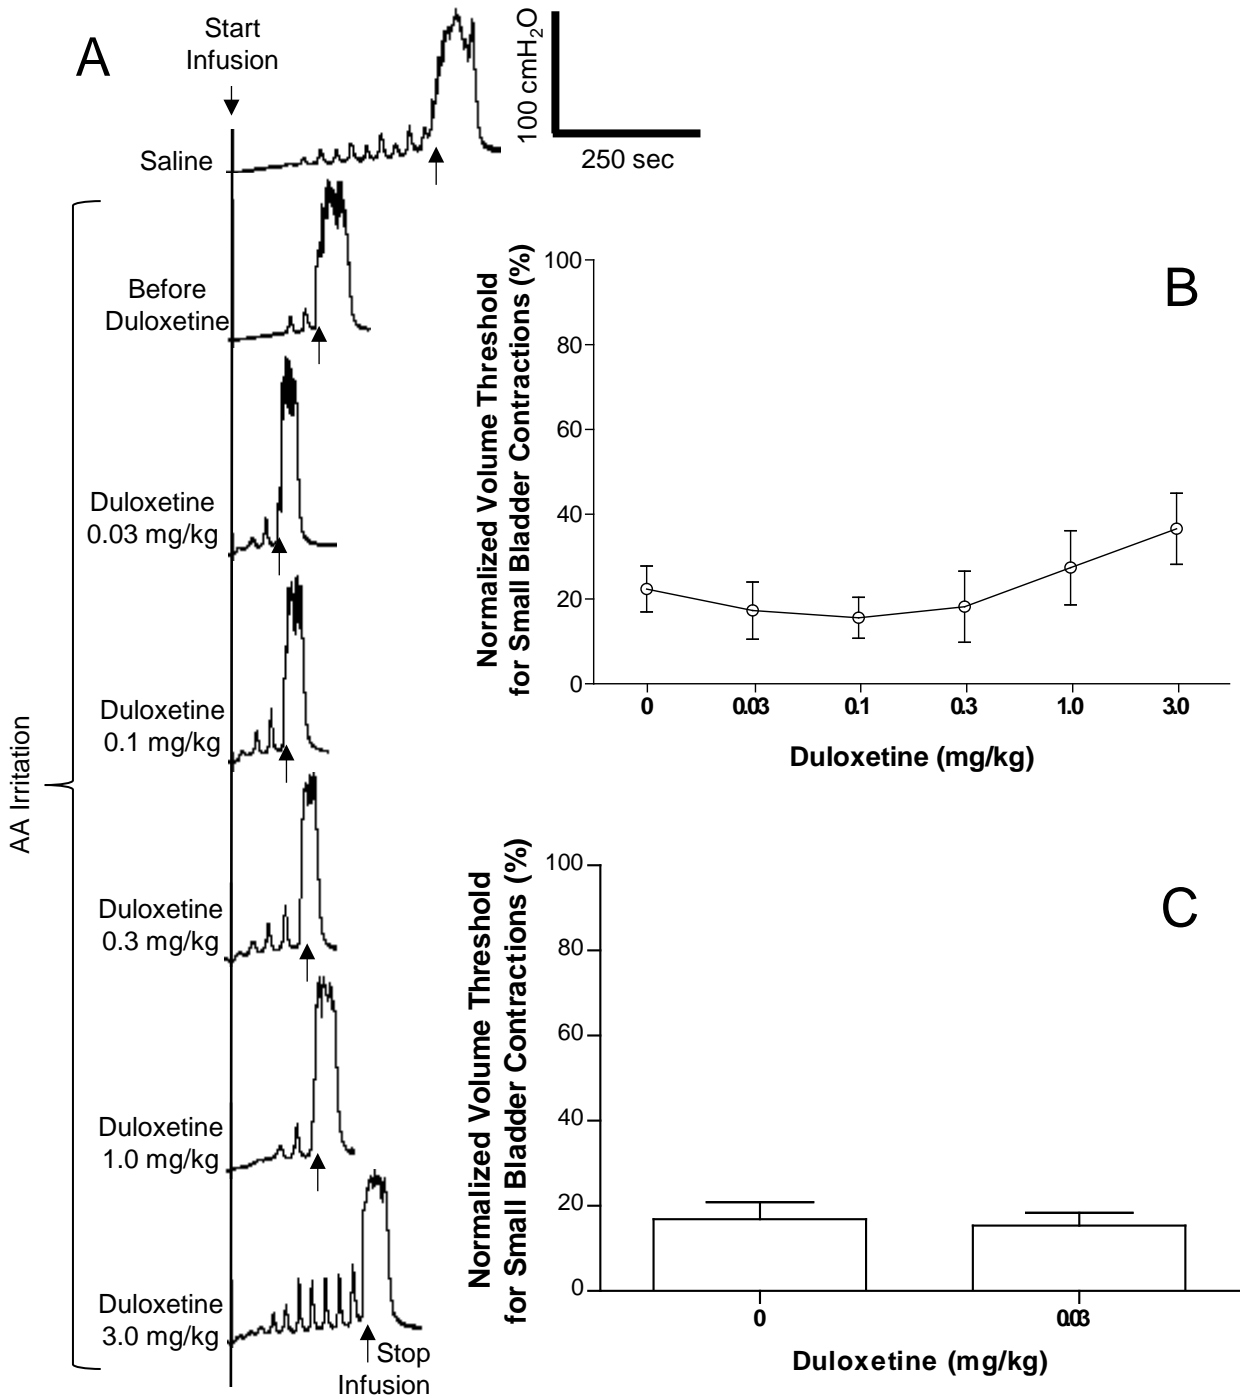

Supplemental Fig.1. Duloxetine did not change the bladder volume threshold for inducing small (>5 cmH<sub>2</sub>O) bladder contractions during acetic acid (AA) irritation. A. Raw CMG traces showing that small bladder contractions can occur during saline and AA infusion before any duloxetine treatment. B. The data were from the same group of cats as shown in Fig.3 (N = 5 cats). C. The data were from total 15 cats. The volume threshold was normalized to bladder capacity measured during saline infusion. When the small bladder contractions did not occur during a CMG, the bladder volume threshold for inducing the large micturition contraction was used in the analysis, which should not mask the excitatory effect of duloxetine on the small bladder contractions.
